# Supplementary material for: Transparent luminescent nanopaper based on g-C3N4 nanosheet grafted oxidized cellulose nanofibrils with excellent thermal and mechanical properties
Source: Royal Society of Chemistry journal article supplement (doi:10.1039/c8tc03812k), 2018-01-01
Supplement: c8tc03812k1.pdf [file c8tc03812k1.pdf]

## Supporting Information

### Transparent luminescent nanopaper based on graphitic carbon nitride nanosheets grafted oxidized cellulose nanofibrills with excellent thermal and mechanical properties

Lan Mu<sup>a</sup>, Liyi Shi<sup>a</sup>, Yanqin Wang<sup>a</sup>, Qianfan Zhou<sup>b</sup>, Jinhong Ye<sup>b</sup>, Xin Feng<sup>a,\*</sup>

<sup>a</sup> Research Center of Nano Science and Technology, and School of Material Science and Engineering, Shanghai University, Shanghai 200444, PR China

<sup>b</sup> Department of Chemistry, College of Science, Shanghai University, Shanghai 200444, PR China

<sup>c</sup> Corresponding Author:

<sup>c</sup> Email: [fengxin@shu.edu.cn](mailto:fengxin@shu.edu.cn) (X. Feng).

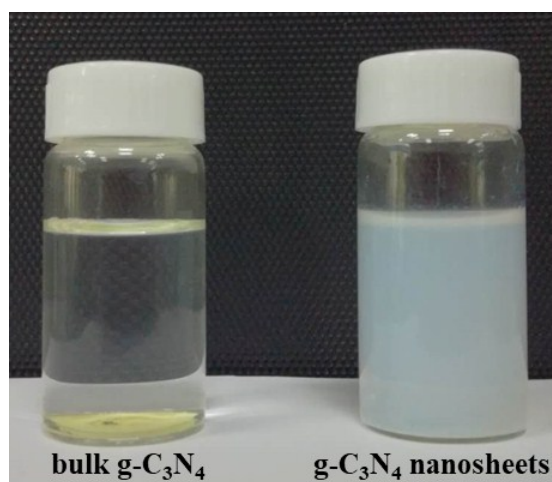

Figure S1. Optical images of bulk g-C<sub>3</sub>N<sub>4</sub> and g-C<sub>3</sub>N<sub>4</sub> nanosheets solutions after storage for more than a month.

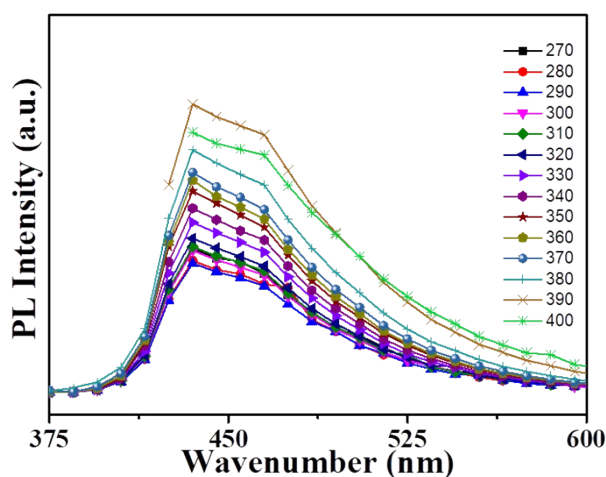

Figure S2. Photoluminescence spectra of as-obtained g-C<sub>3</sub>N<sub>4</sub> nanosheets under different excitations.

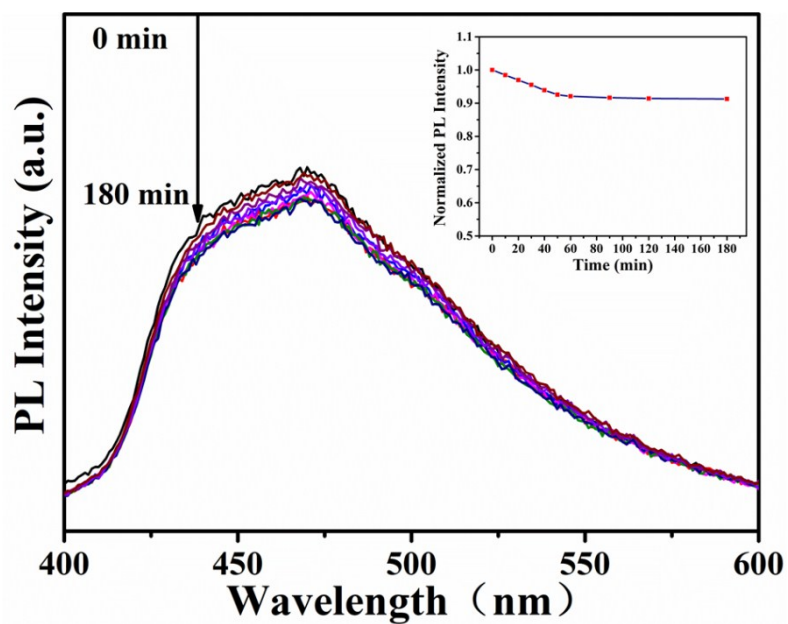

Figure S3 Photostability of the luminescent g-C<sub>3</sub>N<sub>4</sub>@TCNF nanopaper (6 wt%) irradiated with a laser excited at 365 nm for various time points (inset, normalized fluorescence intensity).

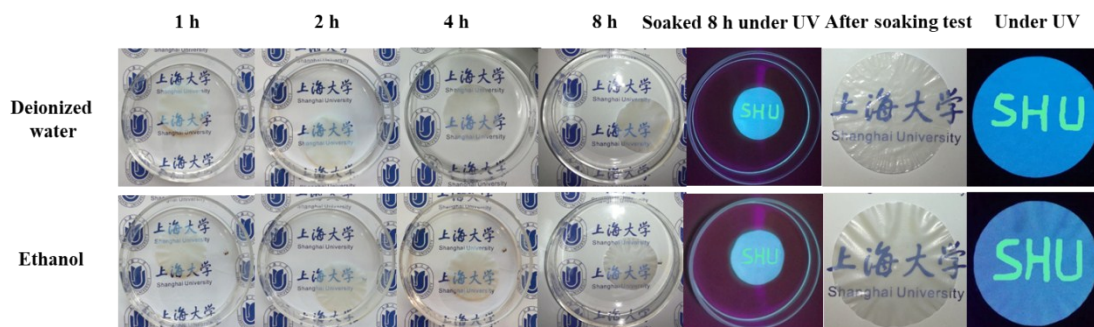

Figure S4 Digital pictures of the g-C<sub>3</sub>N<sub>4</sub>@TCNF nanopaper (6 wt %) soaked in deionized water and ethanol for 1 h, 2 h, 4 h, 8 h and under drying conditions.
